# Supplementary material for: Impact of Land Use/Land Cover and Landscape Pattern on Water Quality in Dianchi Lake Basin, Southwest of China
Source: MDPI journal article supplement (doi:10.3390/su15043145), 2023-02-09
Supplement: s1 [file s1]

**Supporting data for “Impact of land-use/land-cover and landscape pattern on water quality in Dianchi Lake Basin, Southwest of China”, Zhang et al**

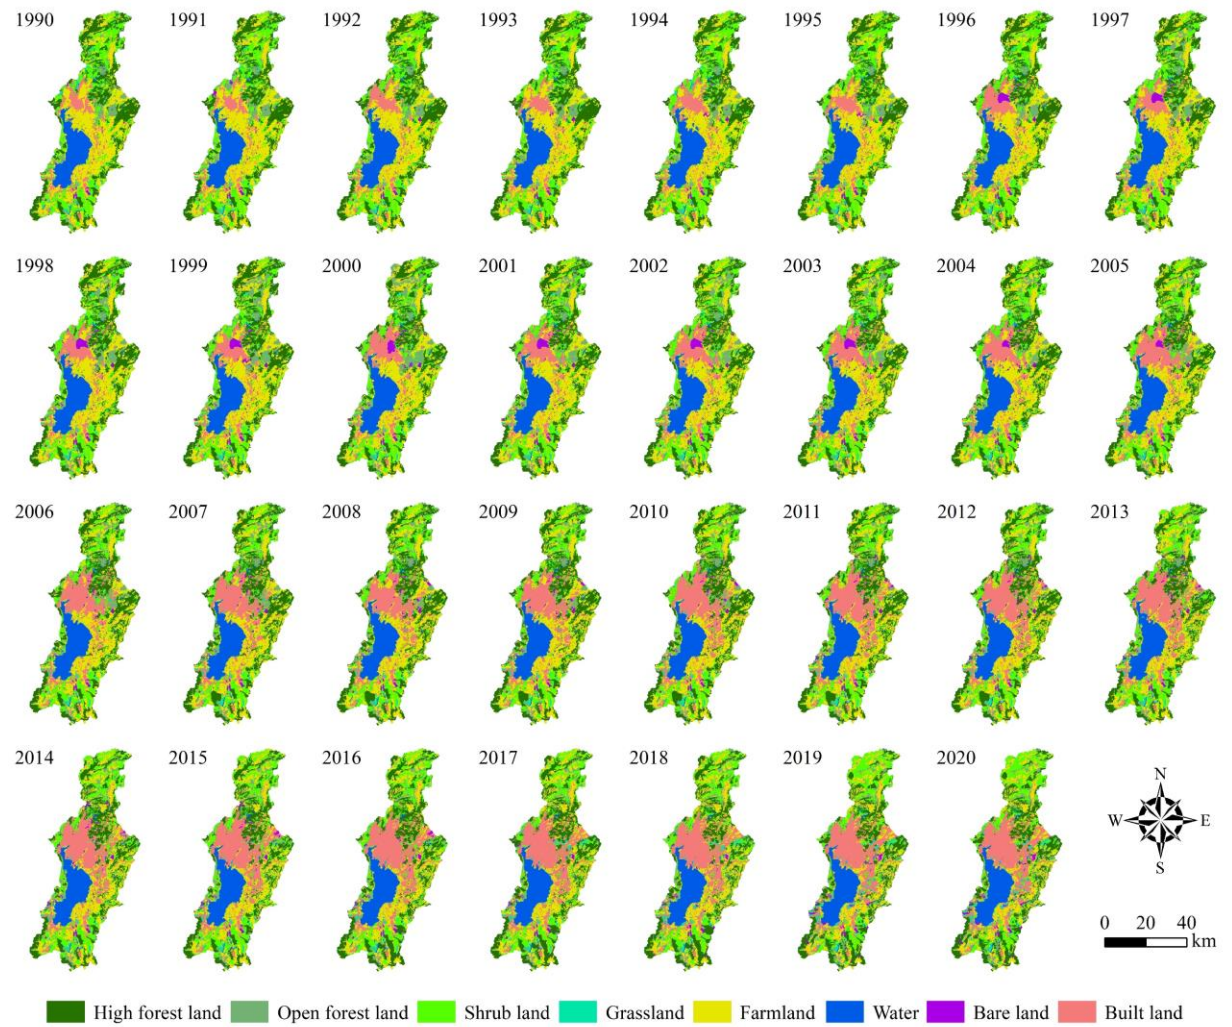

**Figure S1. Land use change pattern in Dianchi Lake Basin from 1990 to 2020**

**Table S1. Water quality data of Waihai Lake from 1990 to 2020**

Note: The average values of the 8 sampling points in Waihai Lake were used to characterize interannual variation in pollutants.

PH(unitless),TP(mg/L),TN(mg/L),COD(mg/L),DO(mg/L),CODMn(mg/L),BOD<sub>5</sub>(mg/L),NH<sub>3</sub>-N(

| Year | PH    | TP    | TN    | COD    | DO    | COD <sub>Mn</sub> | BOD <sub>5</sub> | NH <sub>3</sub> -N | Turbidity | Chla  |
|------|-------|-------|-------|--------|-------|-------------------|------------------|--------------------|-----------|-------|
| 1990 | 8.356 | 0.105 | 1.322 | 58.708 | 8.128 | 7.817             | 3.870            | 0.096              | 0.581     | 0.068 |
| 1991 | 8.560 | 0.124 | 1.536 | 58.708 | 7.814 | 8.114             | 3.786            | 0.197              | 0.583     | 0.068 |
| 1992 | 8.764 | 0.142 | 1.749 | 58.708 | 7.500 | 8.412             | 3.702            | 0.297              | 0.586     | 0.068 |
| 1993 | 8.598 | 0.143 | 1.442 | 64.500 | 7.738 | 9.305             | 3.707            | 0.256              | 0.502     | 0.068 |
| 1994 | 8.895 | 0.211 | 2.537 | 68.344 | 7.624 | 10.564            | 4.648            | 0.353              | 0.379     | 0.068 |
| 1995 | 8.620 | 0.186 | 1.530 | 57.394 | 7.466 | 5.229             | 3.176            | 0.114              | 0.452     | 0.068 |
| 1996 | 9.103 | 0.185 | 1.754 | 58.875 | 7.464 | 6.700             | 3.581            | 0.168              | 0.498     | 0.068 |
| 1997 | 9.131 | 0.204 | 1.724 | 54.403 | 7.950 | 5.911             | 4.594            | 0.359              | 0.495     | 0.068 |
| 1998 | 9.061 | 0.284 | 1.783 | 56.611 | 8.098 | 5.964             | 5.669            | 0.343              | 0.472     | 0.068 |
| 1999 | 8.914 | 0.331 | 2.130 | 75.789 | 7.785 | 6.751             | 6.084            | 0.198              | 0.422     | 0.098 |
| 2000 | 8.418 | 0.273 | 1.956 | 55.667 | 8.965 | 6.664             | 5.408            | 0.232              | 0.490     | 0.085 |
| 2001 | 8.257 | 0.211 | 2.205 | 60.471 | 7.356 | 7.568             | 5.723            | 0.167              | 0.484     | 0.068 |
| 2002 | 8.596 | 0.131 | 1.877 | 65.517 | 8.626 | 5.480             | 4.538            | 0.363              | 0.731     | 0.062 |
| 2003 | 9.171 | 0.154 | 2.050 | 66.614 | 7.698 | 5.348             | 4.616            | 0.314              | 0.603     | 0.067 |
| 2004 | 8.908 | 0.155 | 1.976 | 67.058 | 7.959 | 5.718             | 3.696            | 0.293              | 0.531     | 0.072 |
| 2005 | 8.751 | 0.187 | 1.818 | 60.865 | 7.899 | 6.248             | 3.065            | 0.259              | 0.534     | 0.043 |
| 2006 | 8.808 | 0.176 | 2.179 | 70.458 | 7.999 | 7.049             | 3.465            | 0.327              | 0.462     | 0.072 |
| 2007 | 8.329 | 0.135 | 3.013 | 67.375 | 7.086 | 10.856            | 3.004            | 0.272              | 0.418     | 0.060 |
| 2008 | 8.988 | 0.126 | 2.443 | 57.146 | 6.865 | 9.893             | 3.533            | 0.303              | 0.416     | 0.063 |
| 2009 | 9.080 | 0.136 | 2.288 | 54.617 | 6.928 | 10.731            | 3.559            | 0.304              | 0.417     | 0.067 |
| 2010 | 9.165 | 0.200 | 2.624 | 64.708 | 6.971 | 10.026            | 3.828            | 0.260              | 0.344     | 0.091 |
| 2011 | 8.972 | 0.159 | 2.804 | 73.083 | 6.857 | 10.997            | 3.631            | 0.252              | 0.478     | 0.071 |
| 2012 | 8.906 | 0.175 | 1.957 | 79.156 | 6.970 | 11.326            | 3.591            | 0.300              | 0.407     | 0.088 |
| 2013 | 8.878 | 0.153 | 2.160 | 77.844 | 7.108 | 11.402            | 4.186            | 0.378              | 0.429     | 0.072 |
| 2014 | 8.748 | 0.136 | 1.732 | 69.479 | 7.274 | 9.705             | 3.299            | 0.265              | 0.491     | 0.058 |
| 2015 | 8.669 | 0.106 | 1.606 | 48.094 | 7.321 | 7.859             | 3.532            | 0.203              | 0.466     | 0.050 |
| 2016 | 8.722 | 0.091 | 1.582 | 37.135 | 7.840 | 5.236             | 3.959            | 0.305              | 0.399     | 0.064 |
| 2017 | 8.447 | 0.134 | 1.956 | 41.802 | 8.627 | 6.767             | 3.878            | 0.292              | 0.386     | 0.085 |
| 2018 | 8.890 | 0.067 | 1.177 | 29.385 | 8.423 | 4.793             | 2.113            | 0.211              | 0.467     | 0.045 |
| 2019 | 9.023 | 0.069 | 0.944 | 32.052 | 7.605 | 5.886             | 1.891            | 0.128              | 0.440     | 0.071 |
| 2020 | 8.813 | 0.061 | 1.591 | 29.384 | 7.906 | 5.516             | 2.109            | 0.504              | 0.493     | 0.045 |

mg/L),Turbidity(m),Chla(μg/L).

**Table S2. Water quality data of Caohai Lake from 1990 to 2020**

| Year | PH    | TP    | TN     | COD     | DO    | CODMn  | BOD5   | NH3-N  | Turbidity | Chla  |
|------|-------|-------|--------|---------|-------|--------|--------|--------|-----------|-------|
| 1990 | 7.900 | 0.503 | 4.588  | 55.530  | 5.817 | 18.233 | 20.300 | 0.628  | 0.408     | 0.110 |
| 1991 | 8.350 | 0.737 | 4.508  | 55.530  | 8.417 | 16.583 | 12.650 | 0.717  | 0.500     | 0.110 |
| 1992 | 8.333 | 0.993 | 7.251  | 55.530  | 5.292 | 15.467 | 10.258 | 3.435  | 0.373     | 0.110 |
| 1993 | 7.808 | 1.168 | 8.988  | 88.333  | 3.851 | 15.120 | 13.117 | 5.438  | 0.247     | 0.110 |
| 1994 | 8.067 | 0.921 | 6.768  | 75.917  | 6.110 | 14.067 | 12.925 | 3.277  | 0.379     | 0.110 |
| 1995 | 7.800 | 0.801 | 7.863  | 69.500  | 4.517 | 9.925  | 11.217 | 3.213  | 0.342     | 0.110 |
| 1996 | 8.127 | 0.966 | 8.048  | 76.545  | 5.564 | 8.564  | 16.100 | 3.691  | 0.403     | 0.110 |
| 1997 | 8.010 | 1.066 | 8.926  | 82.450  | 3.985 | 9.930  | 18.610 | 4.500  | 0.355     | 0.110 |
| 1998 | 8.138 | 0.571 | 8.216  | 69.667  | 5.213 | 7.196  | 12.930 | 4.411  | 0.548     | 0.110 |
| 1999 | 7.946 | 0.611 | 8.201  | 74.154  | 5.367 | 7.021  | 9.138  | 4.219  | 0.624     | 0.163 |
| 2000 | 7.796 | 1.063 | 11.893 | 145.875 | 6.108 | 12.513 | 15.388 | 6.206  | 0.425     | 0.135 |
| 2001 | 7.725 | 1.237 | 13.509 | 61.813  | 4.292 | 12.463 | 13.171 | 8.003  | 0.590     | 0.126 |
| 2002 | 7.904 | 1.066 | 11.483 | 79.625  | 5.054 | 8.146  | 10.871 | 7.288  | 0.588     | 0.191 |
| 2003 | 8.438 | 1.146 | 12.338 | 63.727  | 4.758 | 6.963  | 10.633 | 6.873  | 0.636     | 0.104 |
| 2004 | 8.117 | 1.295 | 13.115 | 65.958  | 4.504 | 7.650  | 11.692 | 8.623  | 0.552     | 0.182 |
| 2005 | 7.792 | 1.074 | 13.063 | 60.333  | 4.196 | 6.996  | 9.654  | 9.537  | 0.640     | 0.097 |
| 2006 | 7.758 | 1.434 | 14.310 | 61.333  | 3.800 | 7.071  | 9.750  | 11.209 | 0.608     | 0.089 |
| 2007 | 8.033 | 1.394 | 14.509 | 53.250  | 5.004 | 10.742 | 7.579  | 11.573 | 0.584     | 0.113 |
| 2008 | 8.025 | 1.243 | 15.339 | 44.292  | 6.104 | 9.958  | 10.417 | 11.689 | 0.570     | 0.064 |
| 2009 | 8.179 | 1.456 | 16.790 | 41.208  | 5.371 | 12.596 | 12.754 | 13.018 | 0.517     | 0.140 |
| 2010 | 7.754 | 0.605 | 11.138 | 34.250  | 5.017 | 8.492  | 10.942 | 6.339  | 0.942     | 0.071 |
| 2011 | 7.850 | 0.240 | 6.110  | 38.292  | 6.729 | 8.854  | 8.750  | 1.585  | 0.809     | 0.105 |
| 2012 | 8.004 | 0.195 | 6.292  | 34.458  | 5.421 | 8.404  | 10.279 | 1.853  | 0.679     | 0.115 |
| 2013 | 8.350 | 0.271 | 4.441  | 41.417  | 6.663 | 8.867  | 12.792 | 1.458  | 0.657     | 0.083 |
| 2014 | 8.175 | 0.213 | 4.800  | 57.875  | 7.446 | 9.825  | 10.375 | 1.781  | 0.457     | 0.129 |
| 2015 | 8.154 | 0.181 | 5.091  | 42.083  | 7.554 | 7.096  | 6.708  | 1.192  | 0.493     | 0.118 |
| 2016 | 8.638 | 0.139 | 3.466  | 22.042  | 7.708 | 4.621  | 6.500  | 0.313  | 0.576     | 0.085 |
| 2017 | 8.400 | 0.151 | 3.595  | 23.000  | 8.708 | 5.429  | 6.654  | 0.328  | 0.759     | 0.108 |
| 2018 | 8.469 | 0.118 | 3.000  | 20.806  | 8.451 | 4.694  | 4.940  | 0.263  | 0.732     | 0.081 |
| 2019 | 8.475 | 0.081 | 2.531  | 13.125  | 7.892 | 3.708  | 2.346  | 0.190  | 0.632     | 0.050 |
| 2020 | 8.750 | 0.053 | 2.650  | 13.500  | 8.350 | 3.000  | 2.875  | 0.213  | 0.663     | 0.074 |

Note: The average values of the 2 sampling points in Caihai Lake were used to characterize interannual variation in pollutants.

PH(unitless), TP(mg/L), TN(mg/L), COD(mg/L), DO(mg/L), CODMn(mg/L), BOD5(mg/L), NH3-N(mg/L), Turbidity(m), Chla(μg/L).

**Table S3. Landscape metrics data of Dianchi Lake Basin from 1990 to 2020**

| <b>Year</b> | <b>LPI</b> | <b>LSI</b> | <b>IJI</b> | <b>COHESION</b> | <b>SHDI</b> |
|-------------|------------|------------|------------|-----------------|-------------|
| 1990        | 13.871     | 38.836     | 73.952     | 99.351          | 1.911       |
| 1991        | 13.673     | 38.979     | 73.529     | 99.355          | 1.915       |
| 1992        | 11.788     | 39.202     | 74.227     | 99.326          | 1.925       |
| 1993        | 11.034     | 39.465     | 74.337     | 99.307          | 1.928       |
| 1994        | 10.690     | 40.127     | 75.632     | 99.298          | 1.955       |
| 1995        | 10.051     | 40.411     | 74.791     | 99.238          | 1.949       |
| 1996        | 10.041     | 40.225     | 76.145     | 99.217          | 1.975       |
| 1997        | 10.044     | 41.014     | 76.281     | 99.204          | 1.989       |
| 1998        | 10.044     | 40.812     | 76.587     | 99.153          | 1.994       |
| 1999        | 10.041     | 41.219     | 77.171     | 99.143          | 2.013       |
| 2000        | 10.039     | 41.425     | 77.446     | 99.185          | 2.024       |
| 2001        | 10.041     | 42.169     | 77.019     | 99.104          | 2.008       |
| 2002        | 10.041     | 42.180     | 76.547     | 99.109          | 2.004       |
| 2003        | 10.041     | 42.288     | 76.881     | 99.138          | 2.005       |
| 2004        | 10.036     | 42.043     | 77.169     | 99.175          | 1.989       |
| 2005        | 10.042     | 42.639     | 76.749     | 99.165          | 1.990       |
| 2006        | 10.042     | 42.710     | 76.737     | 99.218          | 1.984       |
| 2007        | 10.786     | 42.751     | 77.116     | 99.202          | 1.985       |
| 2008        | 10.042     | 42.779     | 77.494     | 99.121          | 1.987       |
| 2009        | 10.039     | 41.425     | 77.446     | 99.185          | 2.024       |
| 2010        | 12.417     | 42.853     | 77.653     | 99.194          | 1.985       |
| 2011        | 12.620     | 43.789     | 76.830     | 99.157          | 1.979       |
| 2012        | 12.615     | 43.373     | 77.320     | 99.157          | 1.979       |
| 2013        | 12.758     | 43.076     | 77.920     | 99.140          | 1.995       |
| 2014        | 12.895     | 43.181     | 78.562     | 99.150          | 1.995       |
| 2015        | 13.271     | 45.002     | 77.524     | 99.113          | 1.984       |
| 2016        | 14.911     | 44.736     | 77.892     | 99.139          | 1.983       |
| 2017        | 15.991     | 44.298     | 77.071     | 99.197          | 1.969       |
| 2018        | 15.275     | 44.251     | 77.469     | 99.165          | 1.975       |
| 2019        | 15.606     | 45.401     | 77.899     | 99.136          | 1.989       |
| 2020        | 14.754     | 45.012     | 80.456     | 99.127          | 2.016       |

Note:LPI(unitless),LSI(%),IJI(%),COHESION(%),SHDI(unitless).

**Table S4. Classification of the CWQI values**

| CWQI value    | Water quality rank | Description                                                                                                                             |
|---------------|--------------------|-----------------------------------------------------------------------------------------------------------------------------------------|
| <b>95-100</b> | Excellent          | Water quality is protected and can meet the requirements of the functional areas.                                                       |
| <b>80-94</b>  | Good               | Water quality is protected and only occasionally slightly polluted, which basically meets the requirements of the functional areas.     |
| <b>65-79</b>  | General            | Generally, water quality is protected, but sometimes it is polluted. Sometimes it cannot meet the requirements of the functional areas. |
| <b>50-64</b>  | Poor               | Water quality is often polluted, which cannot meet the requirements of the functional areas.                                            |
| <b>0-49</b>   | Very poor          | Water quality has been seriously polluted almost all the time, which can hardly meet the requirements of the functional areas.          |

**Table S5. Standards used to evaluate the coupling coordination state for the water quality and land-use structure systems in Dianchi Lake Basin**

| Index   | Range               | Status               | Sub-category                     | Characteristics                                           |
|---------|---------------------|----------------------|----------------------------------|-----------------------------------------------------------|
| C Value | $0 < C \leq 0.3$    | Low-level coupling   |                                  |                                                           |
|         | $0.3 < C \leq 0.5$  | Antagonistic stage   |                                  |                                                           |
|         | $0.5 < C \leq 0.8$  | Running-in stage     |                                  |                                                           |
|         | $0.8 < C \leq 1$    | High-level coupling  |                                  |                                                           |
| D Value | $0 < D \leq 0.2$    | Severe maladjustment | $f(x) - f(yn) > 0.1$             | Severe maladjustment—Water quality impact lags behind     |
|         |                     |                      | $f(yn) - f(x) > 0.1$             | Severe maladjustment—landscape pattern impact lags behind |
|         |                     |                      | $0 \leq  f(yn) - f(x)  \leq 0.1$ | Severe maladjustment coordination                         |
|         | $0.2 < D \leq 0.35$ | Mild maladjustment   | $f(x) - f(yn) > 0.1$             | Mild maladjustment—Water quality impact lags behind       |
|         |                     |                      | $f(yn) - f(x) > 0.1$             | Mild maladjustment—landscape pattern impact lags behind   |
|         |                     |                      | $0 \leq  f(yn) - f(x)  \leq 0.1$ | Mild maladjustment coordination                           |
|         | $0.35 < D \leq 0.5$ | Near maladjustment   | $f(x) - f(yn) > 0.1$             | Near maladjustment—Water quality impact lags behind       |
|         |                     |                      | $f(yn) - f(x) > 0.1$             | Near maladjustment—landscape pattern impact lags behind   |
|         |                     |                      | $0 \leq  f(yn) - f(x)  \leq 0.1$ | Near maladjustment coordination                           |
|         | $0.5 < D \leq 0.8$  | Intermediate         | $f(x) - f(yn) > 0.1$             | Intermediate coordination—Water                           |

|  |                  |                           |                                   |                                                                |
|--|------------------|---------------------------|-----------------------------------|----------------------------------------------------------------|
|  |                  | coordination              |                                   | quality impact lags                                            |
|  |                  |                           | $f(y_n) - f(x) > 0.1$             | Intermediate coordination—landscape pattern impact lags behind |
|  |                  |                           | $0 \leq  f(y_n) - f(x)  \leq 0.1$ | Intermediate coordination                                      |
|  | $0.8 < D \leq 1$ | High quality coordination | $f(x) - f(y_n) > 0.1$             | High quality coordination—Water quality impact lags behind     |
|  |                  |                           | $f(y_n) - f(x) > 0.1$             | High quality coordination—landscape pattern impact lags behind |
|  |                  |                           | $0 \leq  f(y_n) - f(x)  \leq 0.1$ | High quality coordination                                      |
